# Supplementary material for: Facile preparation of coating fluorescent hollow mesoporous silica nanoparticles with pH-sensitive amphiphilic diblock copolymer for controlled drug release and cell imaging
Source: Royal Society of Chemistry journal article supplement (doi:10.1039/c2sm07320j), 2012-01-01
Supplement: c2sm07320j.pdf [file c2sm07320j.pdf]

**Facile Preparation of Coating Fluorescent Hollow Mesoporous Silica  
Nanoparticles with pH-Sensitive Amphiphilic Diblock Copolymer for Controlled  
Drug Release and Cell Imaging**

Xiao Mei<sup>a</sup>, Dongyun Chen<sup>a</sup>, Najun Li<sup>a\*</sup>, Qingfeng Xu<sup>a</sup>, Jianfeng Ge<sup>a</sup>, Hua Li<sup>a</sup>, Baixia  
Yang<sup>b</sup>, Yujie Xu<sup>b\*</sup> and Jianmei Lu<sup>a\*</sup>

*<sup>a</sup>Laboratory of Absorbent Materials and Techniques for Environment, College of Chemistry, Chemical Engineering and Materials Science, Soochow University, Suzhou, China 215123.*

*<sup>b</sup>Jiangsu Provincial Key Laboratory of Radiation Medicine and Protection, Medical College of Radiation Medicine and Protection, Soochow University, Suzhou, China 215123.*

*E-mail: [lujm@suda.edu.cn](mailto:lujm@suda.edu.cn); [linajun@suda.edu.cn](mailto:linajun@suda.edu.cn); Fax: +86 (0) 512-6588 0367; Tel: +86 (0)512-6588 0367*

**Supporting Information**

**Table S1** Properties of poly (MPEG(x)-b-DBAM(y))with different feed ratios.

| Feed ratio<br>(x:y) | Conversion<br>(%) | <i>M<sub>n</sub></i><br>(g/mol) | PDI  | Polymer<br>Composition (x:y) |
|---------------------|-------------------|---------------------------------|------|------------------------------|
| 1:25                | 90                | 14700                           | 1.12 | 1:22.5                       |
| 1:30                | 91                | 16800                           | 1.24 | 1:27.3                       |
| 1:50                | 92                | 24780                           | 1.19 | 1:45.8                       |

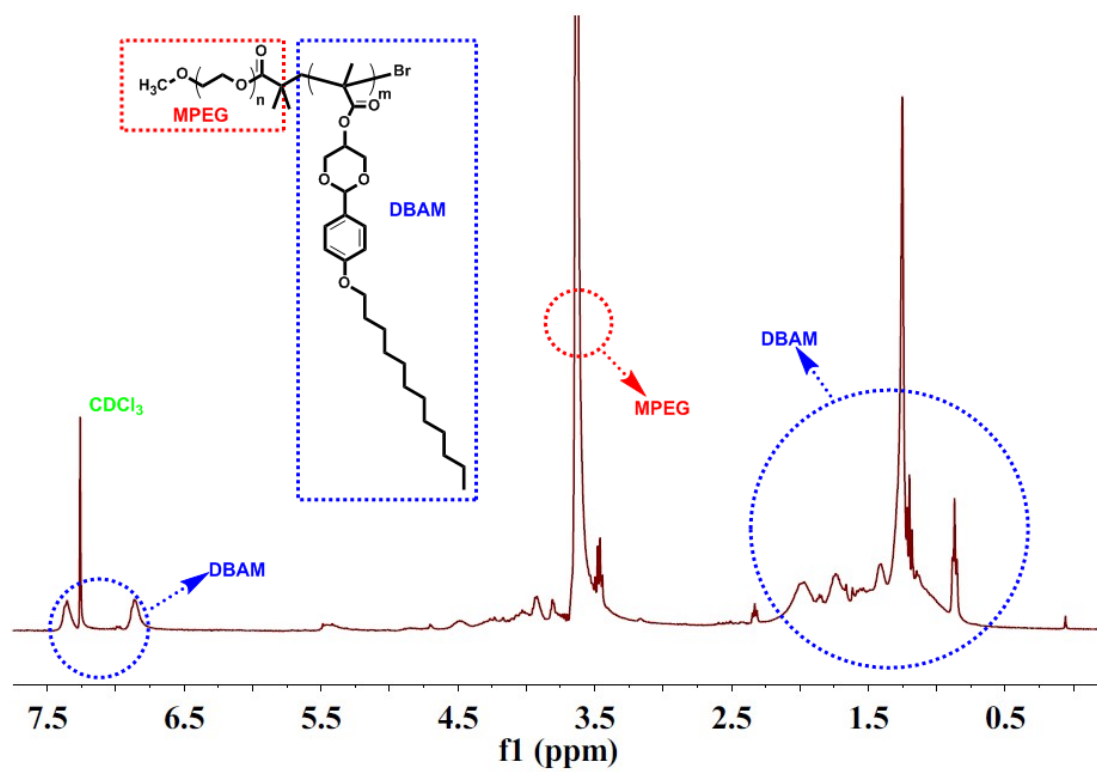

Figure S1  $^1\text{H}$  NMR spectrum ( $\text{CDCl}_3$ , 400MHz) of MPEG-b-DBAM

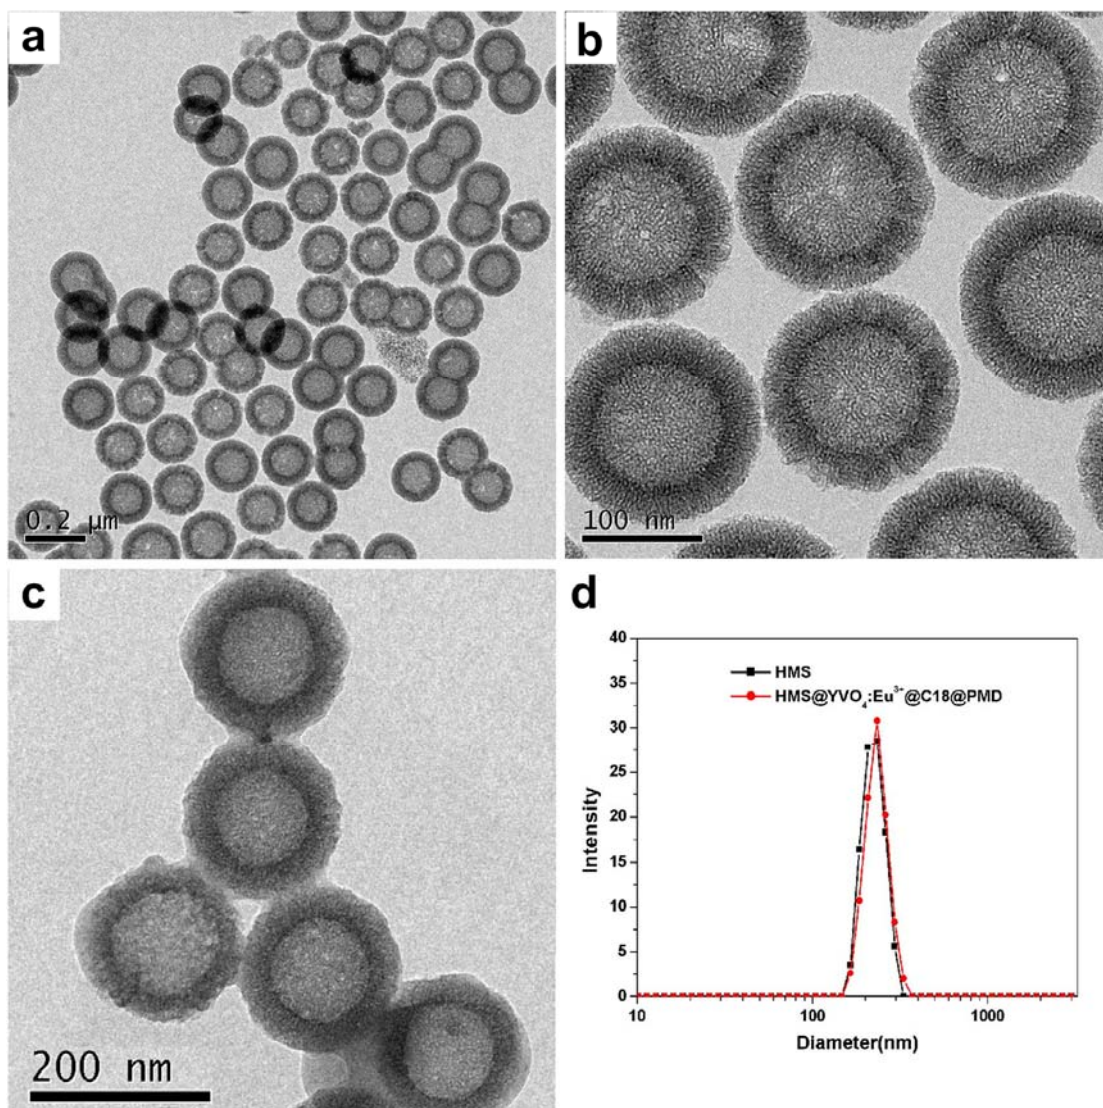

**Figure S2** TEM images of HMS (a), (b), IBU@HMS@YVO<sub>4</sub>:Eu<sup>3+</sup>@C18@PMD (c), size distribution of HMS and HMS@YVO<sub>4</sub>:Eu<sup>3+</sup>@C18@PMD (d)

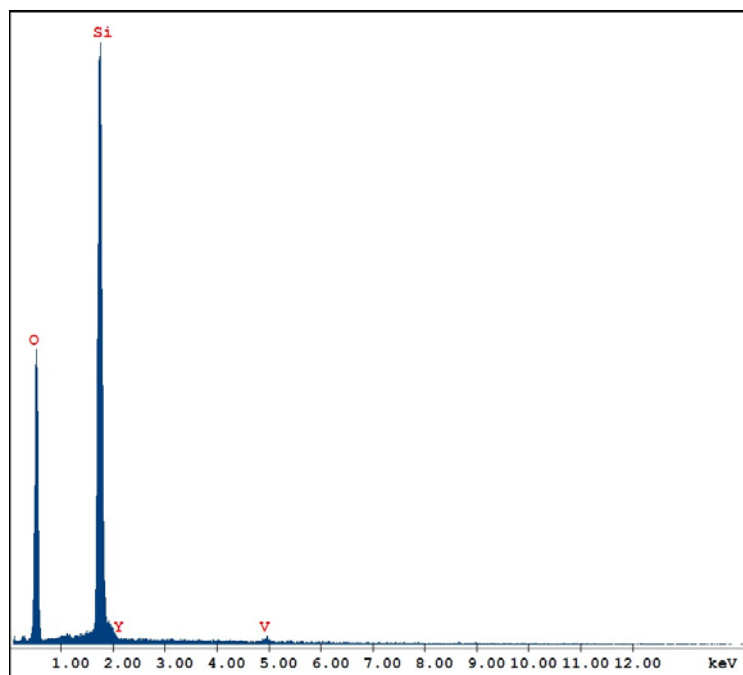

Figure S3 EDS spectrum of HMS@YVO<sub>4</sub>:Eu<sup>3+</sup>

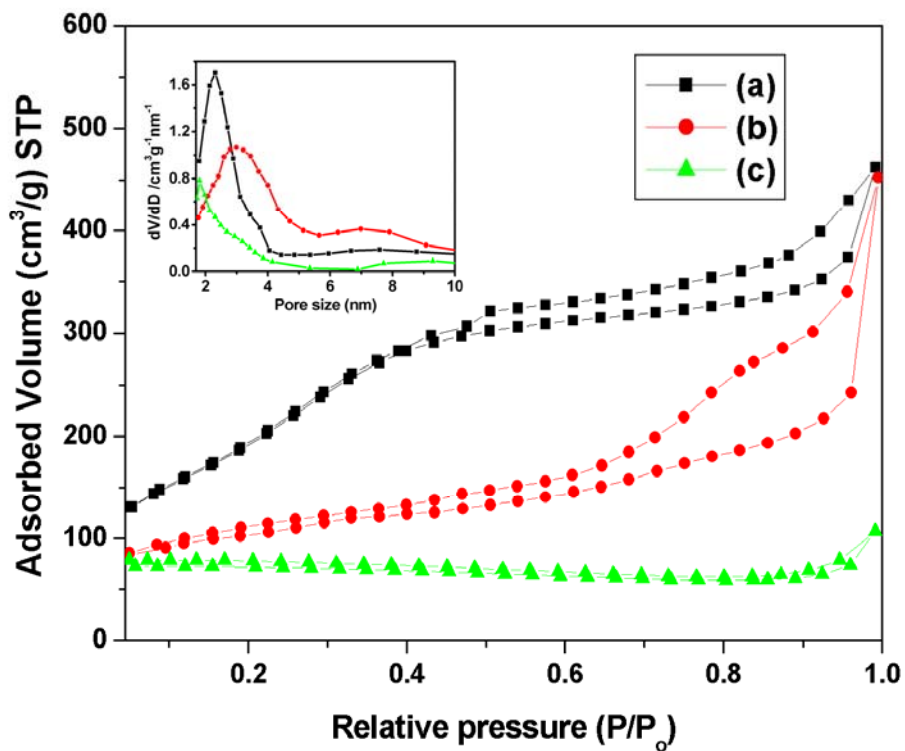

Figure S4 N<sub>2</sub> adsorption-desorption isotherm and the corresponding pore size distribution inset of (a) HMS, (b)

HMS@YVO<sub>4</sub>:Eu<sup>3+</sup>@C18 and (c) IBU@HMS@YVO<sub>4</sub>:Eu<sup>3+</sup>@C18.

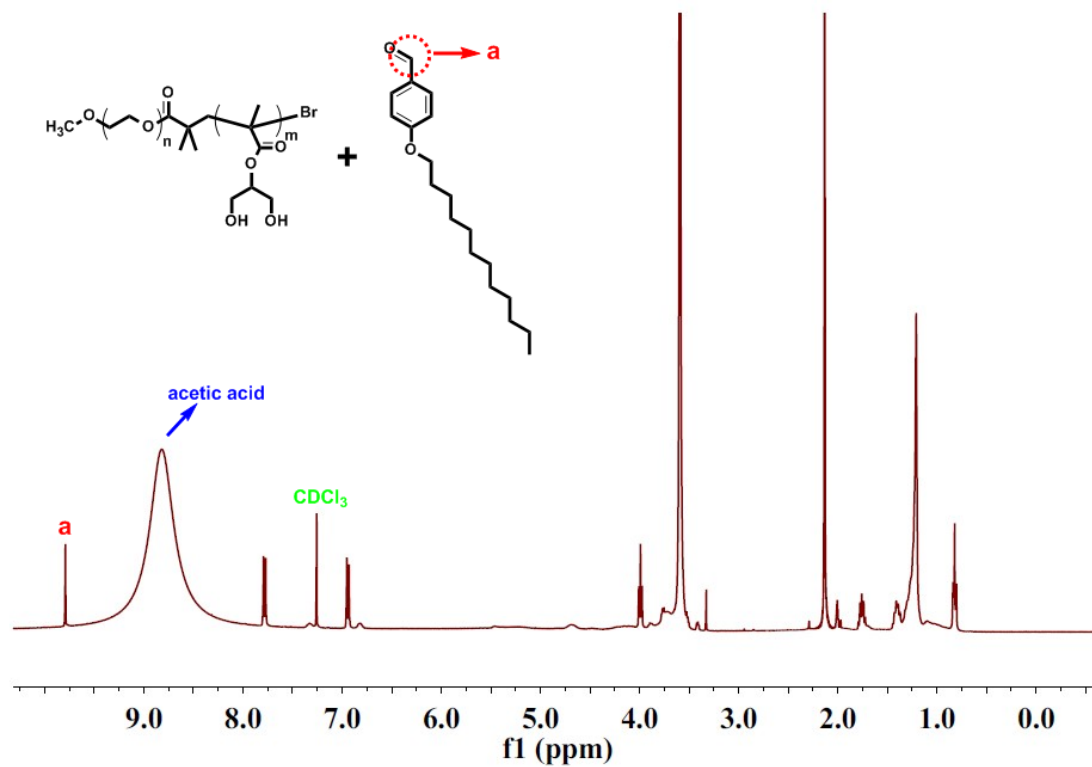

Figure S5 <sup>1</sup>H NMR spectrum (CDCl<sub>3</sub>, 400MHz) of MPEG-b-DBAM after degradation

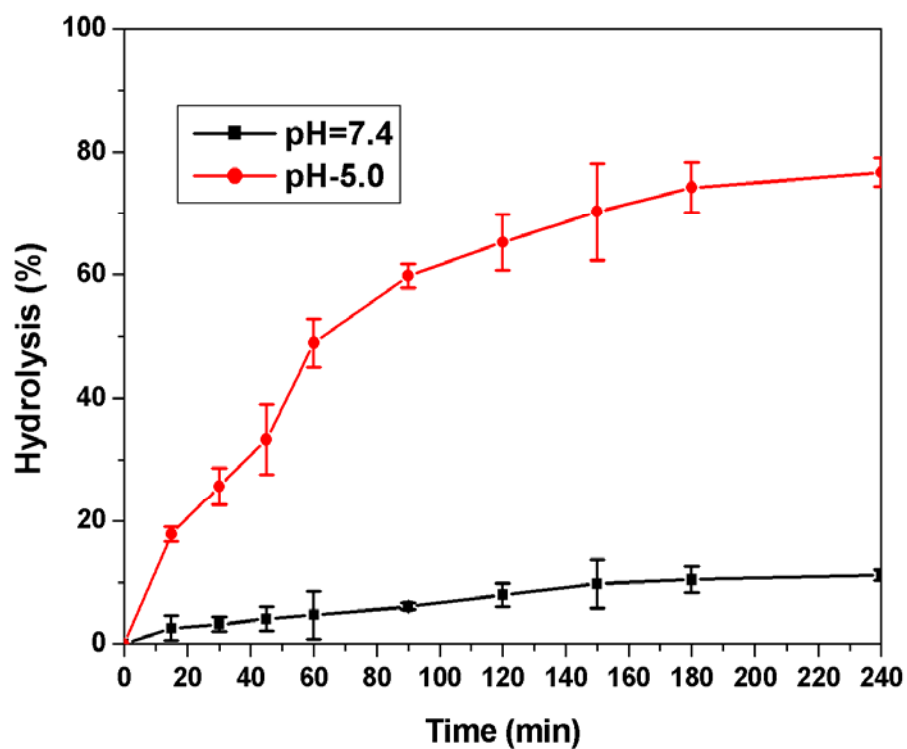

Figure S6 hydrolysis degree of MPEG-b-DBAM as a function of time at different pH at 37°C

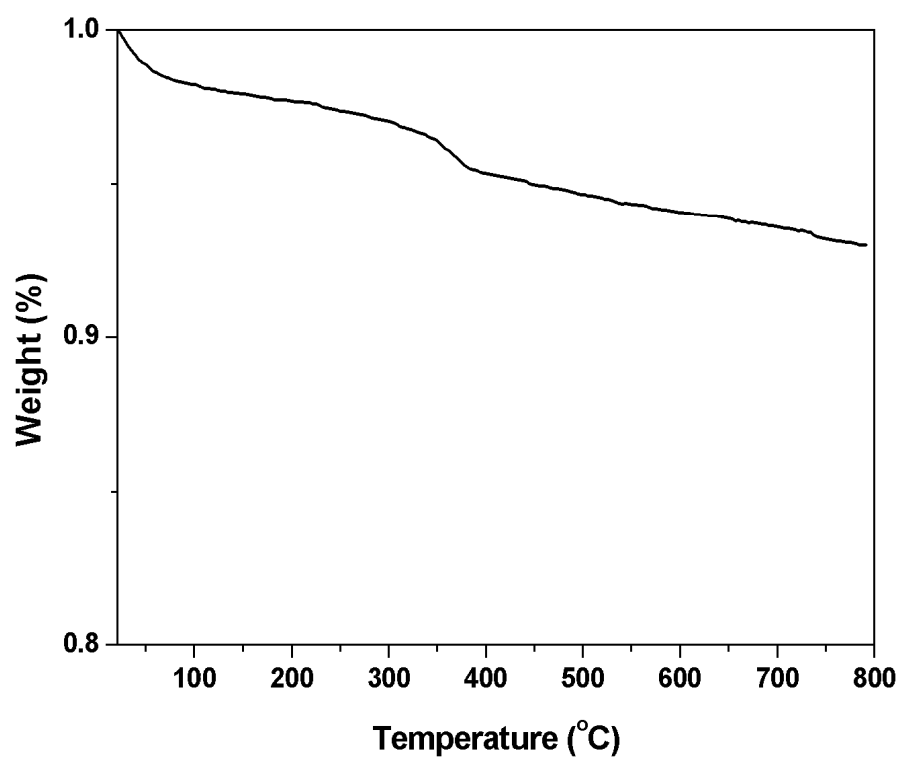

Figure S7 TG analysis of HMS@YVO<sub>4</sub>:Eu<sup>3+</sup>@C18
